# Supplementary material
Source: publisher site journal article supplement (https://www.dovepress.com/article/299467)
Supplement: Supplementary file 1 [file get_supplementary_file.php]

|  | Active phase(n=17) | Recovery phase(n=18) | Control(n=20) | P | PR/A | PC/A | PC/R |
| --- | --- | --- | --- | --- | --- | --- | --- |
| TST/m | 306.1±102.6 | 358.3±70.2 | 419.8±86.6 | 0.0014H | 0.3672H | 0.0006H | 0.0297H |
| NREM/m | 287.9±97.6 | 310.1±51.7 | 355.7±73.9 | 0.0116H | 0.9287H | 0.0148H | 0.035H |
| NREM/% | 94.3±9.3 | 87.1±5.5 | 85.1±5.7 | 0.0005H | 0.007H | 0.0002 H | 0.4931H |
| N1/m | 163.8±95.1 | 100.0±47.2 | 95.6±34.5 | 0.021H | 0.0429H | 0.0274H | 0.9916H |
| N1/% | 55.2±24.2 | 29.0±15.4 | 23.1±7.4 | <0.001H | 0.0004H | <0.001H | 0.4643H |
| N2/m | 108.0±78.3 | 171.3±56.1 | 201.6±50.9 | 0.0012H | 0.0699H | 0.0004H | 0.1624H |
| N2/% | 34.3±20.8 | 47.2±9.8 | 48.4±7.9 | 0.0902H | 0.1139H | 0.1493H | 0.9801H |
| N3/m | 16.1±23.0 | 38.9±25.9 | 58.5±32.0 | 0.0002H | 0.0139H | <0.001H | 0.12H |
| N3/% | 4.8±6.8 | 10.9±7.4 | 13.5±6.1 | 0.0012H | 0.0192H | 0.0005H | 0.4493H |
| REM/m | 18.2±26.2 | 48.1±26.5 | 64.1±26.2 | 0.0001H | 0.0073H | <0.001H | 0.1119H |
| REM/% | 5.7±9.3 | 12.9±5.5 | 14.9±5.7 | 0.0005H | 0.007H | 0.0002H | 0.4931H |
| SE/% | 53.5±17.5 | 68.2±12.0 | 75.5±13.6 | 0.0004 H | 0.0339H | 0.0001H | 0.1211H |
| AI（/h） | 35.9±16.5 | 29.0±14.8 | 18.3±7.0 | 0.0017H | 0.2658H | 0.0007H | 0.0538H |
| Longest N2(min) | 9.7±6.0a | 13.8±5.9 | 16.8±8.1 | 0.0113H | 0.0844H | 0.007H | 0.5962H |
| Spindle duration(s) | 0.82±0.20 a | 1.15±0.18 | 1.15±0.12 | 0.0001H | <0.001H | <0.001H | 0.9794H |
| Spindle frequency(Hz) | 13.5±1.6 a | 13.2±0.7 | 13.1±0.7 | 0.4936H | 0.6679H | 0.49H | 0.9592H |
| Spindle density(/min) | 2.4±1.6 a | 4.9±2.4 | 4.7±1.9 | 0.0008H | 0.0012H | 0.001H | 0.9997H |

Table S1 Comparison between active phase, recovery phase and controls

Abbreviations: TST, Total sleep time; NREM, Non rapid eye movement sleep; N1, N2, N3; N1, N2, N3 stage of sleep; REM, Rapid eye movement sleep; SE, Sleep efficiency; AI, Arousal index; a, data were available for 16 patients with N2 stage of sleep recorded. All statistical analyses were performed using R, version 3.5.3. H, for data that did not meet the assumptions of equal variance or normal distribution, nonparametric tests were used.

|  | episodic events(+)(n=8) | episodic events(-)(n=9) | Control(n=20) | P | P-/+ | PC/+ | PC/- |
| --- | --- | --- | --- | --- | --- | --- | --- |
| TST/m | 302.6±107.0 | 309.2±105.0 | 419.8±86.6 | 0.0054H | 0.9948H | 0.0184H | 0.0101H |
| NREM/m | 293.4±103.5 | 283.0±98.1 | 355.7±73.9 | 0.0351H | 0.9581H | 0.1236H | 0.0513H |
| NREM/% | 97.4±5.3 | 91.5±11.4 | 85.1±5.7 | 0.0007H | 0.3171H | 0.0002H | 0.0178H |
| N1/m | 174.1±118.5 | 154.7±74.9 | 95.6±34.5 | 0.0422H | 0.9958H | 0.1116H | 0.0752H |
| N1/% | 56.0±21.9 | 54.4±27.4 | 23.1±7.4 | 0.0001H | 0.7742H | | <0.001H | | --- | | 0.0001H |
| N2/m | 106.0±66.1 | 109.8±91.8 | 201.6±50.9 | 0.0033H | 0.8518H | 0.0043H | 0.016H |
| N2/% | 37.4±20.6 | 31.6±21.9 | 48.4±7.9 | 0.1437H | 0.957H | 0.3478H | 0.1815H |
| N3/m | 13.4±23.7 | 18.4±23.4 | 58.5±32.0 | 0.0005H | 0.9744H | 0.0007H | 0.0009H |
| N3/% | 4.0±6.4 | 5.5±7.5 | 13.5±6.1 | 0.0028H | 0.94H | 0.0048H | 0.0095H |
| REM/m | 9.2±19.7 | 26.2±29.8 | 64.1±26.2 | 0.0002H | 0.2593H | | <0.001H | | --- | | 0.0037H |
| REM/% | 2.6±5.3 | 8.5±11.4 | 14.9±5.7 | 0.0007H | 0.3171H | 0.0002H | 0.0178H |
| SE/% | 55.4±16.0 | 51.9±19.6 | 75.5±13.6 | 0.0024 H | 0.9792H | 0.0093H | 0.0035H |
| AI（/h） | 26.9±10.7 | 43.9±17.1 | 18.3±7.0 | 0.0002H | 0.0684H | 0.0341H | | <0.001H | | --- | |
| Longest N2(min) | 9.0±4.8 | 10.4±7.3a | 16.8±8.1 | 0.0118H | 0.6394H | 0.01H | 0.118H |
| Spindle duration(s) | 0.74±0.09 | 0.90±0.25 a | 1.15±0.12 | 0.0001H | 0.1077H | | <0.001H | | --- | | 0.0081H |
| Spindle frequency(Hz) | 13.6±1.6 | 13.4±1.6 a | 13.1±0.7 | 0.4747H | 0.8744H | 0.472H | 0.8258H |
| Spindle density(/min) | 2.1±1.3 | 2.6±1.9 a | 4.7±1.9 | 0.0018F | 0.8356 F | 0.0042 F | 0.024 F |

Table S2 Comparison between patients with episodic events, patients without episodic events and controls

Abbreviations: TST, Total sleep time; NREM, Non rapid eye movement sleep; N1, N2, N3; N1, N2, N3 stage of sleep; REM, Rapid eye movement sleep; SE, Sleep efficiency; AI, Arousal index; a, data were available for 8 patients with N2 stage of sleep recorded. All statistical analyses were performed using R, version 3.5.3. F, the data was normal distributed with equal variance; H, for data that did not meet the assumptions of equal variance or normal distribution, nonparametric tests were used.

|  | HMs(+)(n=8) | HM(-)(n=9) | Control(n=20) | P | P-/+ | PC/+ | PC/- |
| --- | --- | --- | --- | --- | --- | --- | --- |
| TST/m | 281.6±115.1 | 327.8±91.3 | 419.8±86.6 | 0.004H | 0.6461H | 0.0035H | 0.0367H |
| NREM/m | 264.8±117.1 | 308.4±77.8 | 355.7±73.9 | 0.0278H | 0.7107H | 0.0287H | 0.1697H |
| NREM/% | 93.5±12.6 | 95.0±5.7 | 85.1±5.7 | 0.0015H | 0.9984H | 0.0037H | 0.0029H |
| N1/m | 162.7±127.0 | 164.8±63.1 | 95.6±34.5 | 0.0324H | 0.7107H | 0.2371H | 0.0293H |
| N1/% | 57.8±28.2 | 52.9±21.6 | 23.1±7.4 | 0.0001H | 0.9998H | 0.0001H | | <0.001H | | --- | |
| N2/m | 93.5±86.4 | 120.9±73.0 | 201.6±50.9 | 0.0028H | 0.6667H | 0.0024H | 0.0238H |
| N2/% | 33.1±25.2 | 35.4±17.5 | 48.4±7.9 | 0.1346H | 0.8866H | 0.4062H | 0.1487H |
| N3/m | 8.6±15.2 | 22.7±27.4 | 58.5±32.0 | 0.0003H | 0.5021H | 0.0001H | 0.0032H |
| N3/% | 2.6±4.0 | 6.7±8.3 | 13.5±6.1 | 0.0016H | 0.4066H | 0.0008H | 0.0304H |
| REM/m | 16.8±30.2 | 19.4±24.0 | 64.1±26.2 | 0.0003H | 0.9269H | 0.0004H | 0.0008H |
| REM/% | 6.5±12.6 | 5.0±5.7 | 14.9±5.7 | 0.0015H | 0.9984H | 0.0037H | 0.0029H |
| SE/% | 50.3±17.7 | 56.4±17.9 | 75.5±13.6 | 0.0018 H | 0.6533H | 0.0014H | 0.0158H |
| AI（/h） | 33.6±18.9 | 38.0±14.8 | 18.3±7.0 | 0.0006H | 0.6151H | 0.0077H | 0.0002H |
| Longest N2(min) | 10.7±7.7a | 8.9±4.7 | 16.8±8.1 | 0.0155H | 0.9289H | 0.086H | 0.0191H |
| Spindle duration(s) | 0.82±0.21a | 0.81±0.20 | 1.15±0.12 | 0.0004H | 0.9999H | 0.001H | 0.0003H |
| Spindle frequency(Hz) | 13.7±1.1a | 13.4±1.9 | 13.1±0.7 | 0.3527H | 0.6323H | 0.33H | 0.9045H |
| Spindle density(/min) | 2.4±1.2a | 2.4±1.9 | 4.7±1.9 | 0.0022H | 0.9952H | 0.0091H | 0.0031H |

Table S3 Comparison between patients with HMs, patients without HMs and controls

Abbreviations: TST, Total sleep time; NREM, Non rapid eye movement sleep; N1, N2, N3; N1, N2, N3 stage of sleep; REM, Rapid eye movement sleep; SE, Sleep efficiency; AI, Arousal index; a, data were available for 7 patients with N2 stage of sleep recorded. All statistical analyses were performed using R, version 3.5.3. H, for data that did not meet the assumptions of equal variance or normal distribution, nonparametric tests were used.
